# Supplementary material
Source: PubMed Central journal article supplement (PMC4505221)
Supplement: AAC.00753-15_zac008154190so1.pdf [file AAC.00753-15_zac008154190so1.pdf]

**Supplementary Figure 1:** Homology between amino acid sequences of FusA like proteins in *S. aureus*, *Enterobacteriaceae*, *A. baumannii*, *Pseudomonas aeruginosa* and *Stenotrophomonas maltophilia*.

FusA alignment full proteins

CLUSTAL O(1.2.1) multiple sequence alignment

|                    |                                                                            |     |
|--------------------|----------------------------------------------------------------------------|-----|
| S.aureusNCTC8325   | MAREFSLKTRNIGIMAHIDAGKTTTTTERILYYTGRIHKIGETHEGASQMDWMEQEQDRG               | 60  |
| P.aeruginosaPA01   | MARTTPIELYRNIGIVAHVDAGKTTTTTERILFYTGVNHHKMGVHDGAATMDWVQEQERG               | 60  |
| A.baumannii        | MARQTPITRYRNIGISAHIDAGKTTTTTERILFYTGVSCHKIGEVHDGAATMDWMEQEQERG             | 60  |
| S.maltophiliaK279a | MARSTPIERYRNIFGIMAHIDAGKTTTTSERILFYTGKSHKIGEVHDGAATMDWMEQEQERG             | 60  |
| Enterobacteriaceae | MARTTPIARYRNIGISAHIDAGKTTTTTERILFYTGVNHHKIGEVHDGAATMDWMEQEQERG             | 60  |
|                    | *** : **:* **:******:***:*** **:*:*:*: **** **:*                           |     |
| S.aureusNCTC8325   | ITITSAATTAAWEG-----HRVNIIDTPGHVDFTEVERSLRVLGDGAVTVLDAQSGV                  | 112 |
| P.aeruginosaPA01   | ITITSAATTAAPWQGSTKQFPHRFYRNIIDTPGHVDFTEVERSLRVLGDGAVTVLDAQSGV              | 120 |
| A.baumannii        | ITITSAATTCFWSGGMNQFPQ-HRINVIDTPGHVDFTEVERSMRVLGDGAVTVLDAQSGV               | 119 |
| S.maltophiliaK279a | ITIQSAATTAAPWQGMKSLPE-HRINVIDTPGHVDFTEVERSLRVLGDGAVTVLDAQSGV               | 119 |
| Enterobacteriaceae | ITITSAATTAAPWQGMKSLPE-HRINVIDTPGHVDFTEVERSMRVLGDGAVTVLDAQSGV               | 119 |
|                    | *** **:* **:* **:******:***:*** **:*:*:*: **** **:*                        |     |
| S.aureusNCTC8325   | EPQSETVWRQANKYHVPRLAYVNMKDRQADFLRVVAQIKQRLGHVPVPIQLATIGAEDEF               | 172 |
| P.aeruginosaPA01   | EPQSETVWRQANKYHVPRLAYVNMKDRQADFLRVVAQIKQRLGHVPVPIQLATIGAEDEF               | 180 |
| A.baumannii        | QPQSETVWRQANKYHVPRLAFVNMKDRGTGANFFRVVEQMKTRLGANPVPIVVPVIGAEDEF             | 179 |
| S.maltophiliaK279a | QPQSETVWRQANKYHVPRIAFAVNMKDRGTGANFQKVVQQLKAKLGAVAVPMQLPVGAEDEF             | 179 |
| Enterobacteriaceae | QPQSETVWRQANKYHVPRIAFAVNMKDRGTGANFLKVVNQIKTRLGANPVPIQLATIGAEDEF            | 179 |
|                    | :**:******:* **:*:*:***:*** **:* **:* **:* **:* **:* **:* **:* **:*        |     |
| S.aureusNCTC8325   | EAITDLVEMKCFKYTN-DLGTETEETEIPEDHLDRAEFARASLIEAVAETSDELMEKYLK               | 231 |
| P.aeruginosaPA01   | SGQIDLVMKKAIIYNDADQGTSYREEEIPAEELRALAEWRAMVEAAEAANDLNMKYLE                 | 240 |
| A.baumannii        | TGVVDLIMKKAIIYNDADQGTSYREEEIPAEELRALAEWRAMVEAAEAANDLNMKYLE                 | 239 |
| S.maltophiliaK279a | KGVVDLIMKKAIIYNDADQGTSYREEEIPAEELRALAEWRAMVEAAEAANDLNMKYLE                 | 239 |
| Enterobacteriaceae | TGVVDLVMKKAIIYNDADQGTVEYEDIPADMVELLANEWHQNLIESAAEAASEELMEKYLK              | 239 |
|                    | :**:***:*: **:* **:* **:* **:* **:* **:* **:* **:* **:* **:* **:* **:*     |     |
| S.aureusNCTC8325   | DEETSVSELKEAIRQATTNVEFYVPLCGTAFKNGVQLMLDAVIDYLPSPLDVVKPIIGHR               | 291 |
| P.aeruginosaPA01   | GEELSTEEIKAGLRQRTLANQIVPAVLGSSFKNGVPLVLDVIDYLPAPSEIPAIRGTD                 | 300 |
| A.baumannii        | EGDLKSEDIITAGLRARLASEIQVMLCGSAFKNKGVQRLDAVIEFLPSPTEVKATIGIL                | 299 |
| S.maltophiliaK279a | GEELAEAEIINALRTRTLATEIVPMYCGSAFKNKGVQAMLQVQQLPSPVDVPMKGVQD                 | 299 |
| Enterobacteriaceae | GEELTEAETKGLRQRLNNEIILVTGSAFKNKGVQAMLDAVIDYLPSPVDVPAINGIL                  | 299 |
|                    | ::: :: :* * : : : * : : : * : : : * : : : * : : : * : : : * : : : *        |     |
| S.aureusNCTC8325   | ASNPEEEVIAKADDSAEFAALAFKVMTPYVVKLTFFRVYSGVTMTSGSYVKNSTKGRER                | 351 |
| P.aeruginosaPA01   | PDDEEKHDERHADDEPFSSALAFKIATDPFVGTLTFRVYSGVLTSGDAVLNSVKGKKER                | 360 |
| A.baumannii        | DDKDETASREASDEAPFSSALAFKIMNDKFGVNLTFVRVYSGVLTSGDAVYVYKSKRER                | 359 |
| S.maltophiliaK279a | VDDQTVEMTRKSDKAPFSSALAFKIITDPFVGTLTFRVYSGVLTSGDAVYVYKSKRER                 | 359 |
| Enterobacteriaceae | DDGKDTPAERHASDDEPFSSALAFKIATDPFVGTLTFRVYSGVLTSGDAVYVYKSKRER                | 359 |
|                    | . :*.* **:******: * **:* **:* **:* **:* **:* **:* **:* **:* **:* **:*      |     |
| S.aureusNCTC8325   | VGRLLQMHANSRQEIOTVYSGDIAAAVGLKDTGDTLCEKNDIILESMEFPFVPIHLS                  | 411 |
| P.aeruginosaPA01   | VGRMVMQHANQRDEIKEVRAGDTAALIGMKNVDTGDTLCAIDKPIILERMDFPDPVIVSA               | 420 |
| A.baumannii        | IGRIVQMHANERQDIDEIRAGDIAACVGLKDVTTGDTLCEKNIITLERMEFPFVPIQLA                | 419 |
| S.maltophiliaK279a | IGRILQMHNSNREEIKEVLAGDTIAAAVGLKDTTGTGDTLCAVDAPIIILERMDFPDPVIVSA            | 419 |
| Enterobacteriaceae | FGRIVQMHANKREEIKEVRAGDTAAATGLKDVTTGDTLCPDAPIIILERMDFPDPVIVSA               | 419 |
|                    | :**:***:*:*: **:* **:* **:* **:* **:* **:* **:* **:* **:* **:* **:* **:*   |     |
| S.aureusNCTC8325   | VEPKSKADQDKMTQALVKLQEEEDPTFHAHTDEETGQVIIGMGELHLDIIVDRMKREFNV               | 471 |
| P.aeruginosaPA01   | VEPKTKADQEKMGIALSKLAQEDPSFRVKTDEEATQTIISGMGELHLDIIVDRMRREFGV               | 480 |
| A.baumannii        | VEPKTKADQEKMSIALGRLAQEDPSFRVKTDEEATQTIISGMGELHLDIIVDRMRREFGV               | 479 |
| S.maltophiliaK279a | VEPKTKADQEKMGIALGRLAQEDPSFRVKTDEEATQTIISGMGELHLDIIVDRMRREFNV               | 479 |
| Enterobacteriaceae | VEPKTKADQEKMGIALGRLAQEDPSFRVKTDEEATQTIISGMGELHLDIIVDRMRREFNV               | 479 |
|                    | ***:***:***:* **:* **:* **:* **:* **:* **:* **:* **:* **:* **:* **:* **:*  |     |
| S.aureusNCTC8325   | ECNVGAPMVSRETFFKSS-AQVQGKFSRQSGGRGQYGDVHIEFTPNETG-----                     | 519 |
| P.aeruginosaPA01   | EANIGKPVAVYRETIKKT-CEIEGKFSRQSGGRGQYGDVHIEFTPNETG-----                     | 528 |
| A.baumannii        | EANIGKPMVAVYRETIKKT-VEQEGKFSRQSGGRGQYGDVHIEFTPNETG-----                    | 529 |
| S.maltophiliaK279a | EANVGAQVAVYRETIKKT-CEIEGKFSRQSGGRGQYGDVHIEFTPNETG-----                     | 539 |
| Enterobacteriaceae | EANVGAQVAVYRETIKKT-VEQEGKFSRQSGGRGQYGDVHIEFTPNETG-----                     | 530 |
|                    | *:*:* **:******: **:* **:* **:* **:* **:* **:* **:* **:* **:* **:*         |     |
| S.aureusNCTC8325   | -AGFEFENAVGGVVPREYIPVVEAGLKDAMENQVLAGYPLIDVKAKLYDGSYHDVDSSE                | 578 |
| P.aeruginosaPA01   | QEGLEPHNEVVGVIIPREFIPATQKGIEDQMGVLAGYPLIGLKATVYDGSYHDVDSSE                 | 588 |
| A.baumannii        | GKEYEFAEEVVGVIIPREFIPATQKGIEDQMGVLAGYPLIGLKATVYDGSYHDVDSSE                 | 589 |
| S.maltophiliaK279a | KDDFLFINDITGGVIPKIEFIPVVEAGLKDAMENQVLAGYPLIDVKAKLYDGSYHDVDSSE              | 599 |
| Enterobacteriaceae | PKGYEFINDITGGVIPKIEFIPVVEAGLKDAMENQVLAGYPLIDVKAKLYDGSYHDVDSSE              | 590 |
|                    | * : : **:* **:* **:* **:* **:* **:* **:* **:* **:* **:* **:* **:* **:* **: |     |
| S.aureusNCTC8325   | MAFKIAASLALKEAACKDVPVILEPMMKVTIEMPEEYMGDIMGDVTSSRRGRVDGMEPR--              | 636 |
| P.aeruginosaPA01   | MAFKIAASMATKQLSQKGGAVLLEPVMKVEVVTPEYMGDIMGDVTSSRRGRVDGMEPR--               | 648 |
| A.baumannii        | LSFKMAGSYAFRDGFMKADPVLLEPIMKVEVETPEYMGDIMGDVTSSRRGRVDGMEPR--               | 649 |
| S.maltophiliaK279a | MAFKIASMAFKQGFKAQKPVLLLEPIMKVEVETPEYMGDIMGDVTSSRRGRVDGMEPR--               | 659 |
| Enterobacteriaceae | LAFKLAASIAFKEGFKKAKPVLLLEPIMKVEVETPEENTGDTGDLSSRRGRVDGMEPR--               | 650 |
|                    | ::**:* **:* **:* **:* **:* **:* **:* **:* **:* **:* **:* **:* **:* **:     |     |
| S.aureusNCTC8325   | GNAQVNNAYVPLSEMPGYATLSRNTQGRGTMYFDHYAEVPKSIAEDIKKNKGE*--                   | 693 |
| P.aeruginosaPA01   | G--KVIRAEVPLGEMPGYATDVRSMQGRASYSMEFVRYAEVPAVSAEIVARQGR*--                  | 702 |
| A.baumannii        | -GTAKIAEVPVLAEMPGYATQMRSMQGRATYSMEFAKYAETPRNVAEIGIAKFAQAGKK                | 708 |
| S.maltophiliaK279a | GSASIIINAMIPVLAEMPGYATLSRNTQGRGTMYFDHYAEVPAVSAEIVARQGR*--                  | 713 |
| Enterobacteriaceae | G--VKIHAIEVPLSEMPGYATLSRNTQGRGTMYFDHYAEVPAVSAEIVARQGR*--K-                 | 704 |
|                    | :* **:******: **:* **:* **:* **:* **:* **:* **:* **:* **:* **:* **:        |     |
| S.aureusNCTC8325   | ----- 693                                                                  |     |
| P.aeruginosaPA01   | ----- 702                                                                  |     |
| A.baumannii        | GDOE* 712                                                                  |     |
| S.maltophiliaK279a | ----- 713                                                                  |     |
| Enterobacteriaceae | ----- 704                                                                  |     |
